# Supplementary material for: A solid thermal and fast synthesis of MgAl-hydrotalcite nanosheets and their applications in the catalytic elimination of carbonyl sulfide and hydrogen sulfide
Source: Royal Society of Chemistry journal article supplement (doi:10.1039/d0nj05809b), 2021-01-01
Supplement: d0nj05809b1.zip [file d0nj05809b1.zip]

**Supporting Information**

**Solidthermal and Fast Synthesis of MgAl-hydrotalcite Nanosheet and Their Applications in Catalytic Elimination of Carbonyl Sulfide and Hydrogen Sulfide**

Guanqing Zhang, Xun Kan, Yong Zheng, Yanning Cao, Shijiang Liang*, Yihong Xiao, Fujian Liu* and Lilong Jiang

National Engineering Research Center of Chemical Fertilizer Catalyst, College of Chemical Engineering, Fuzhou University, Fuzhou 350002, Fujian, P. R. China.

E-mail: [sjliang2012@fzu.edu.cn](mailto:sjliang2012@fzu.edu.cn); [fjliu@fzu.edu.cn](mailto:fjliu@fzu.edu.cn)

**Experimental section**

**Chemicals and regents**

MgAl-LDHs sample, Al2O3 (AR), Fe2O3 (≥99%), TiO2 (AR, ≥99%) were purchased from Aldrich, Sinopharm group Co. Ltd., China, Adamas and Macklin, respectively.

**Preparation of compared samples**

g-C3N4 solid base was prepared as the literature1. Briefly, 10 g of dicyandiamide (Sinopharm Chemical Reagent, ≥98.0 %) was heated to 600 °C at a rate of 2.3 °C/ min and calcined at this temperature for 4 h in an NH3 flow (60 mL/ min). The obtained product is herein denoted as g-C3N4.

K2CO3@γ-Al2O3 compared catalystwas prepared as the literature2. Briefly, γ-Al2O3 support was impregnated with 5% mass content of K2CO3 solution and was placed in an ultrasonic bath for 30 min. Finally, the material was dried at 120 °C for 3–4 h, and is denoted herein as K2CO3@γ-Al2O3.

CeO2 compared catalystwas prepared as the literature3. Typically, 1.3 g of Ce(NO3)3·6H2O and 4 g of urea were dissolved in 50 mL of distilled water. Then, 6 mL of NH3·H2O was slowly introduced, the mixture was stirred for 25 min, which was subsequently transferred into a 100 mL Teflon-lined autoclave and treated at 150 °C for 24 h. The pristine product was obtained from centrifugation, washing with ultrapure water and ethanol for three times, and drying at 90 °C overnight. Before use, the CeO2 was calcined at 500 °C for 4 h under air condition.

For comparison, MA-LDHs-cp was prepared by co-precipitation method as the literature4. Briefly, an aqueous solution containing Mg(NO3)2·6H2O and Al(NO3)3·9H2O (Mg/Al molar ratio=3/1) was slowly into the sodium carbonate aqueous solution at room temperature, the reaction mixture turn cloudy and precipitate was formed. The pH of the solution was adjusted to 10 ± 0.5 by using sodium hydroxide aqueous solution. After aging at 90 °C for 24 h under stirring. The MA-LDHs-cp can be obtained from filteration, washing with abundant deionized water, and drying at 100 °C for another 12 h.

**Table S1** Different O species content of MA-LDHs-x samples according to O1s spectra.

| Sample | M-OH (%) | H2O (%) | M-O (%) |
| --- | --- | --- | --- |
| MA-LDHs-1:3 | 41.91 | 32.56 | 23.53 |
| MA-LDHs-1:1 | 46.51 | 23.89 | 29.6 |
| MA-LDHs-2:1 | 53.44 | 21.95 | 24.61 |
| MA-LDHs-3:1 | 56.36 | 26.48 | 17.16 |
| MA-LDHs-4:1 | 51.41 | 31.46 | 17.13 |
| MA-LDHs-5:1 | 48.37 | 27.68 | 23.95 |

**Table S2** Comparison of different catalysts used for COS hydrolysis.

| Feed | Catalyst | WHSV (mL g-1·h-1) | Temp. (°C) | Conv. (%) | Refs. |
| --- | --- | --- | --- | --- | --- |
| 110 mg/m3 COS/N2 | MA-LDHs-3:1 | 12000 | 110 | 100 | This work |
| 110 mg/m3 COS/N2 | MA-LDHs-3:1 | 6000 | 90 | 100 | This work |
| 200 ppm COS/N2 | Co/CeO2 | 6000 | 150 | 69.8 | S15 |
| 110 mg/m3 COS/N2 | HKUST-1-E25 | 4500 | 110 | 79.4 | S16 |
| 110 mg/m3 COS/N2 | A-N-OMC-900 | 6000 | 130 | 100 | S17 |
| COS/N2= 1/99 | Zn-Al HTLCs | 10 000 | 50 | 55.1 | S18 |
| 500 ppm COS/N2 | Fe-Cu-KOH/WSB | 10 000 | 70 | 54.2 | S19 |

**Table S3** Comparison of different catalysts used for H2S selective oxidation.

| Feed | Catalyst | WHSV (mL g-1·h-1) | Temp. (°C) | Conv. (%) | Sel. (%) | Refs. |
| --- | --- | --- | --- | --- | --- | --- |
| H2S/O2/N2= 0.5/0.25/99.25 | MA-LDHs-3:1 | 12 000 | 120 | 100 | 100 | This work |
| H2S/O2/N2= 0.5/0.25/99.25 | MA-LDHs-2:1 | 12 000 | 120 | 100 | 100 | This work |
| H2S/O2/N2= 0.5/0.25/99.25 | MgAlCeO-0.8 | 5000 | 120 | 91 | 100 | S5 |
| H2S/O2/N2= 0.5/0.25/99.25 | Mg2Al0.6Fe0.4O | 24 000 | 120 | 85.3 | 100 | S6 |
| H2S/O2/N2= 0.5/0.25/99.25 | Mg2Al0.3V0.7O | 24 000 | 120 | 62.5 | 100 | S7 |
| H2S/O2/N2= 0.05/0.025/99.925 | 8%V2O5/CeO2 | 18 000 | 200 | 90 | 98.2 | S8 |
| H2S/O2/He= 5/2.5/92.5 | CeO2-TiO2 | 10 000 | 250 | 100 | 98.9 | S9 |
| H2S/O2/N2= 0.5/0.25/99.25 | NH2-MIL-53(Fe) | 3000 | 160 | 94 | 90 | S10 |
| H2S/O2/N2= 0.5/0.25/99.25 | Fe2O3/SiC | 3000 | 250 | 100 | 81 | S11 |
| H2S/O2/N2= 0.5/0.25/99.25 | Al2O3 | 10 500 | 180 | 94.6 | 10 | S12 |
| H2S/O2/He= 1/1.1/97.8 | Fe/Al2O3 | / | 250 | 69 | 89 | S13 |
| H2S/O2/He= 1/15/86 | Ni-Cu modified NFC | 3100 | 200 | 78 | 25 | S14 |


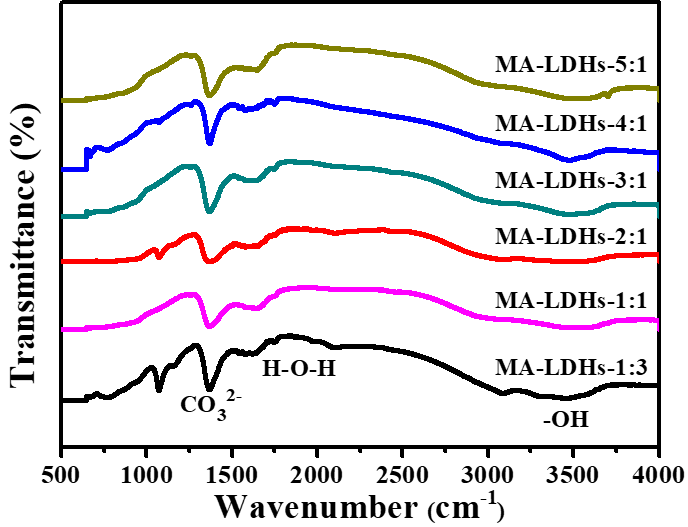


**Figure S1** FT-IR spectra of MA-LDHs-x samples.

**
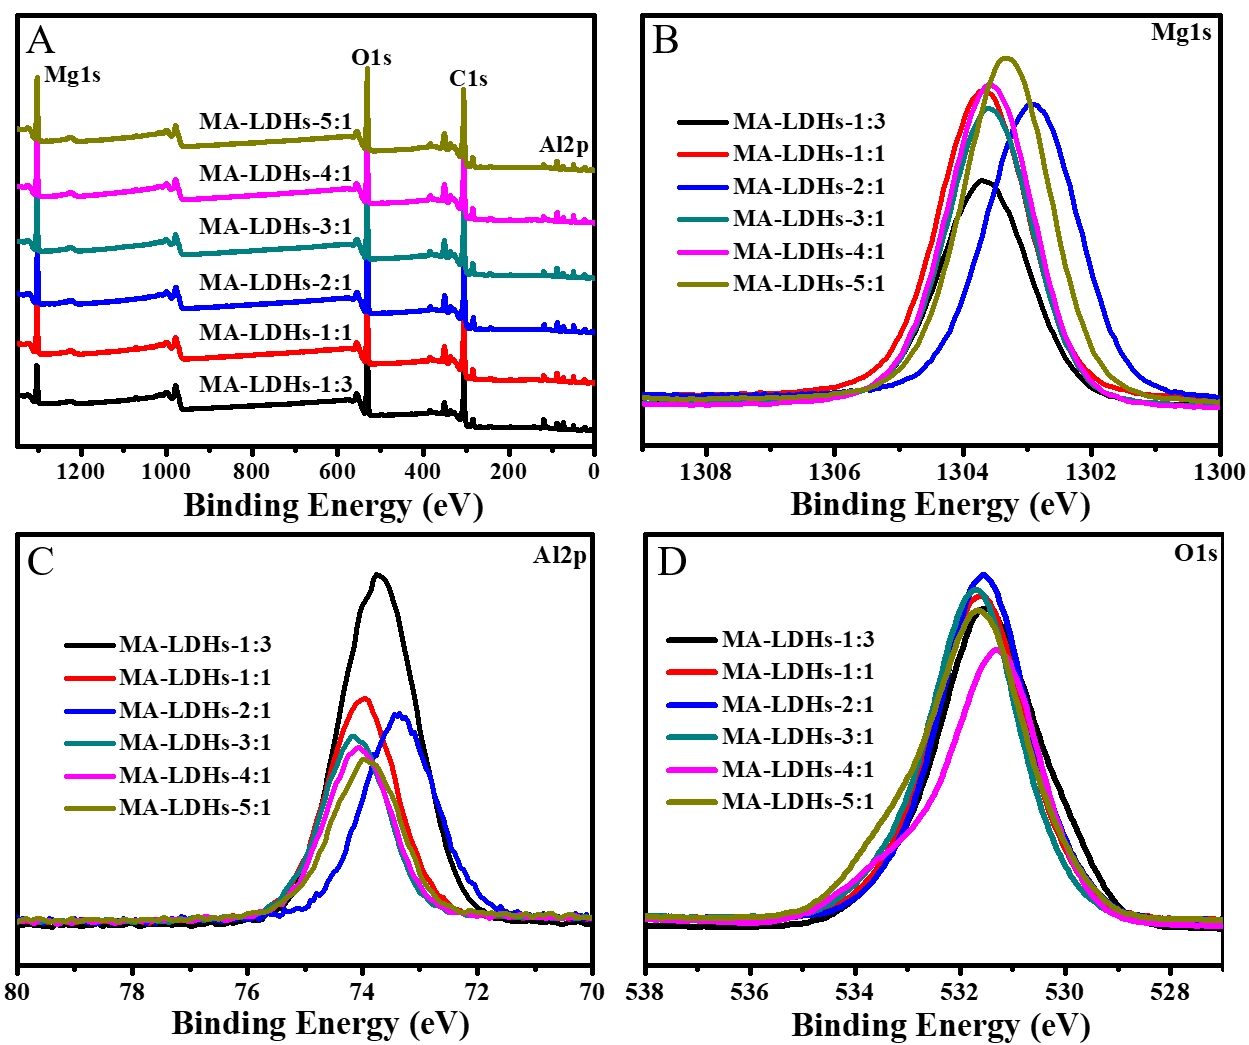
**

**Figure S2** XPS spectra of MA-LDHs-x samples. A: Survey; B: Mg1s; C: Al2p and D: O1s.


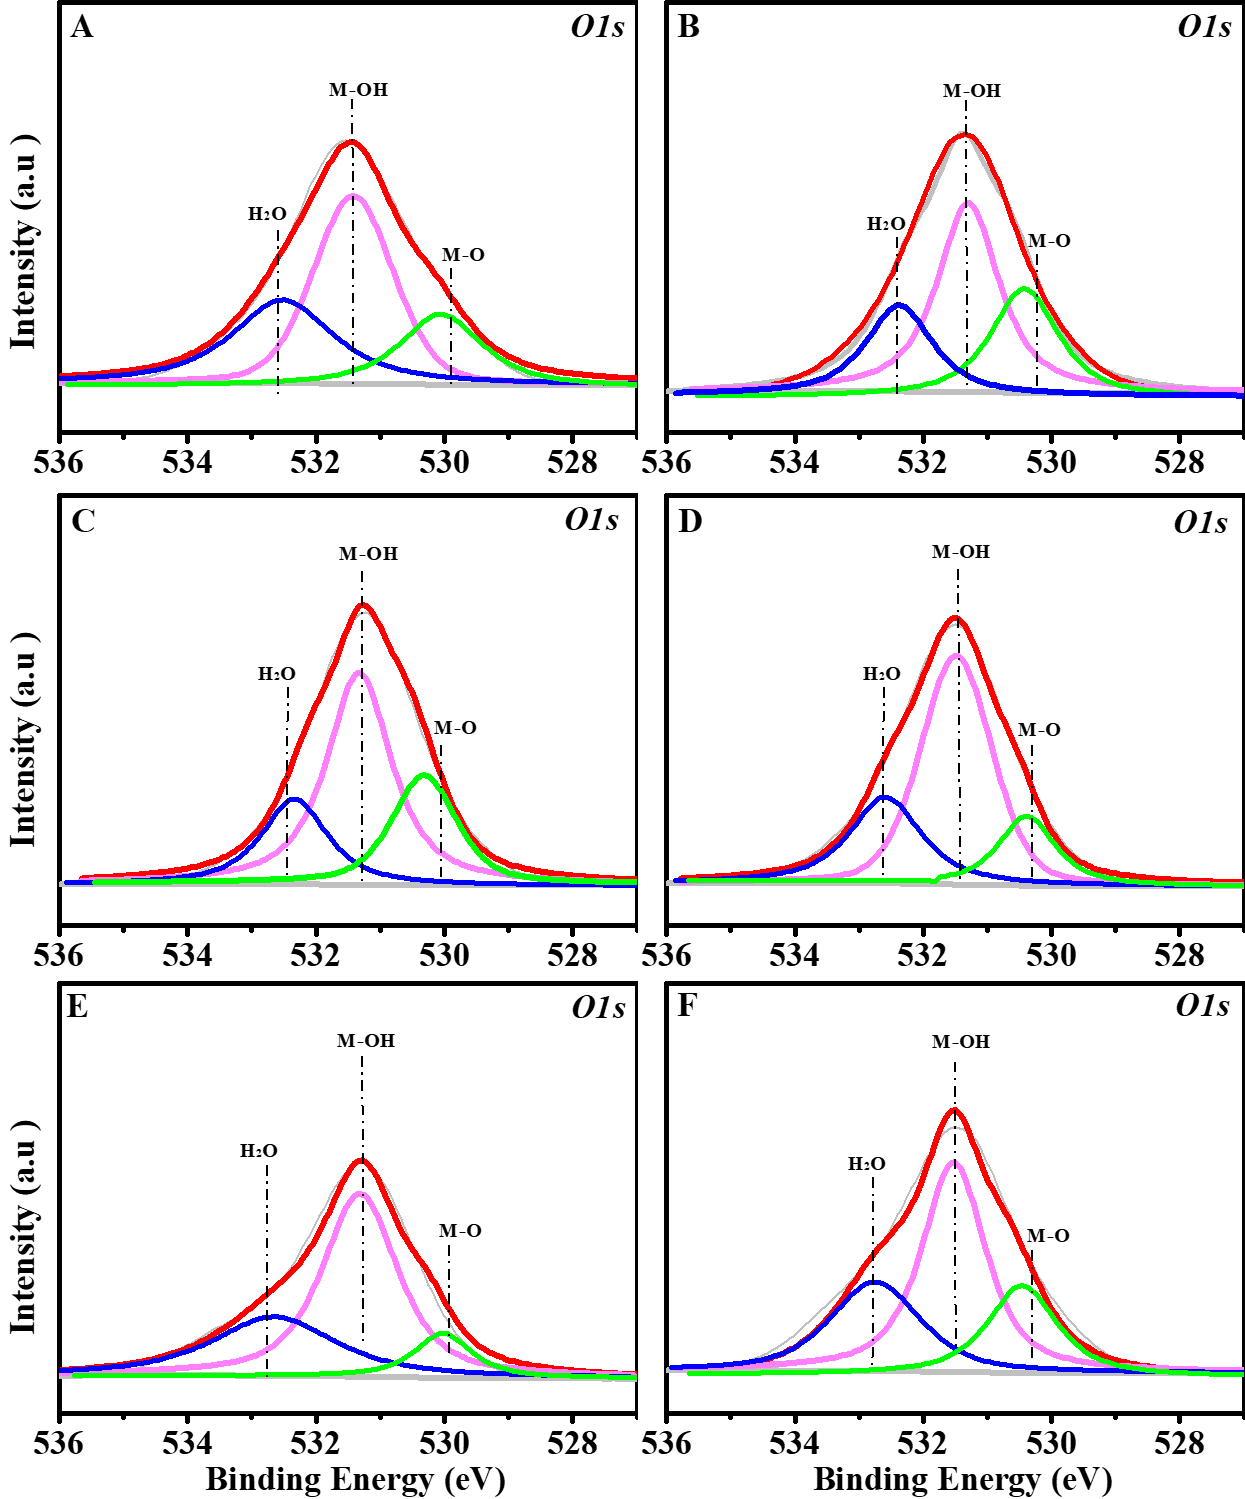


**Figure S3** O1s spectra of MA-LDHs-x samples, A: MA-LDHs-1:3; B: MA-LDHs-1:1; C: MA-LDHs-2:1; D: MA-LDHs-3:1; E: MA-LDHs-4:1; F: MA-LDHs-5:1.


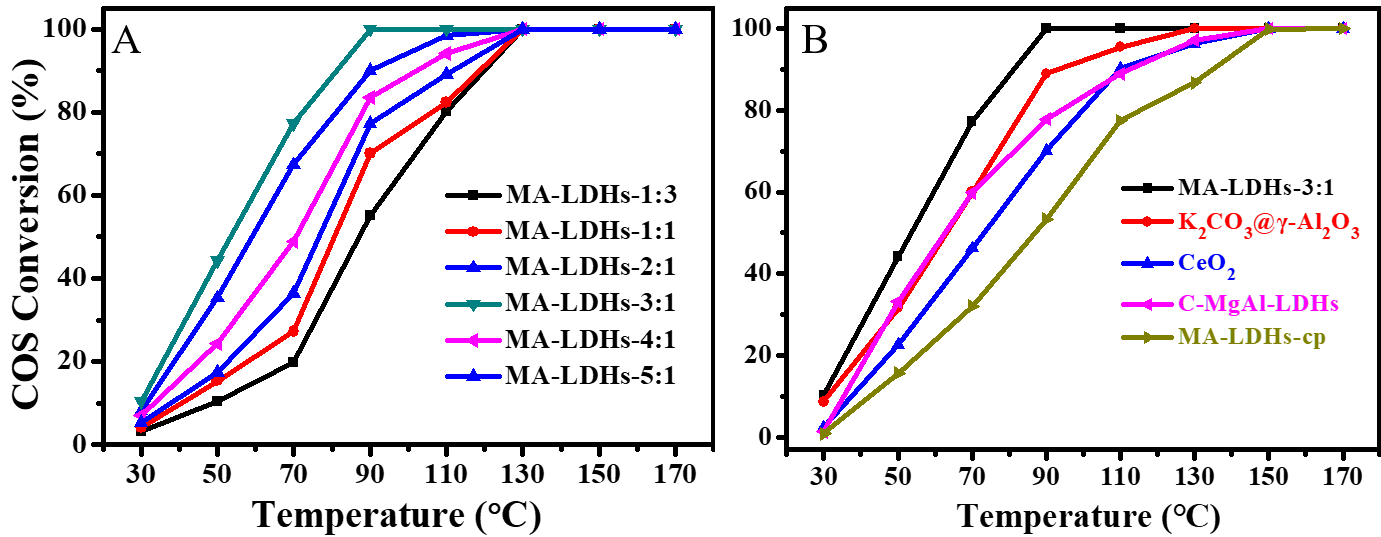


**Figure S4** Effect of temperature on COS hydrolysis over (A) MA-LDHs-x and (B) various kinds of reference catalysts. Reaction condition: 200 mg of catalyst, feed gas 110 mg/m3 COS/N2, WHSV (6000 mL g-1·h-1), water temperature 40 °C.


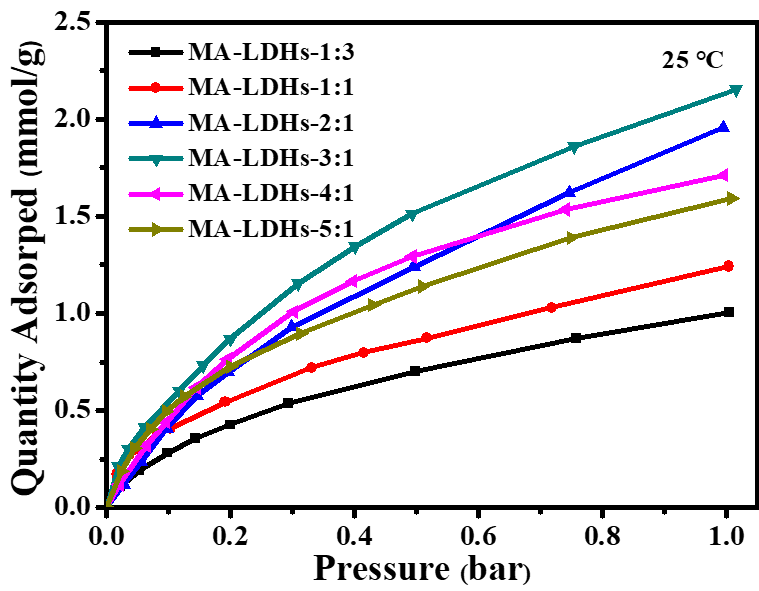


**Figure S5** H2S adsorption isotherm of MA-LDHs-x samples


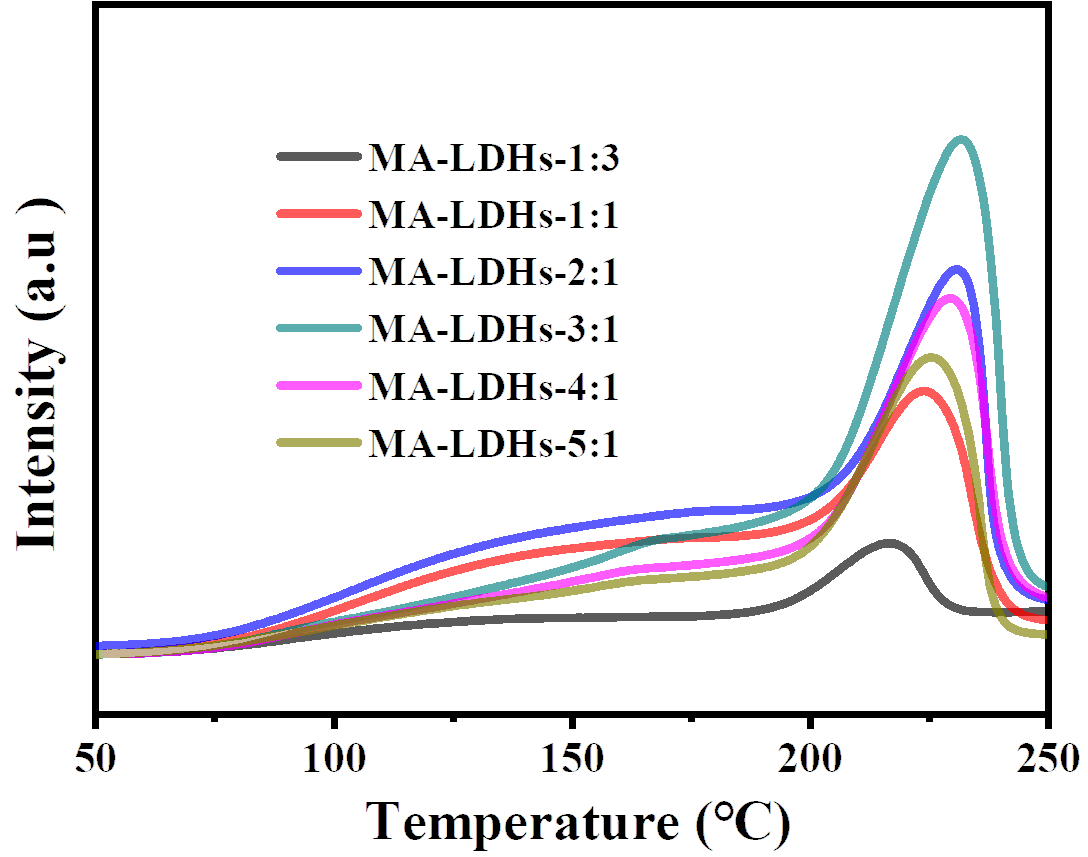


**Figure S6** H2S-TPD-MS experiments conducted over MA-LDHs-x samples.


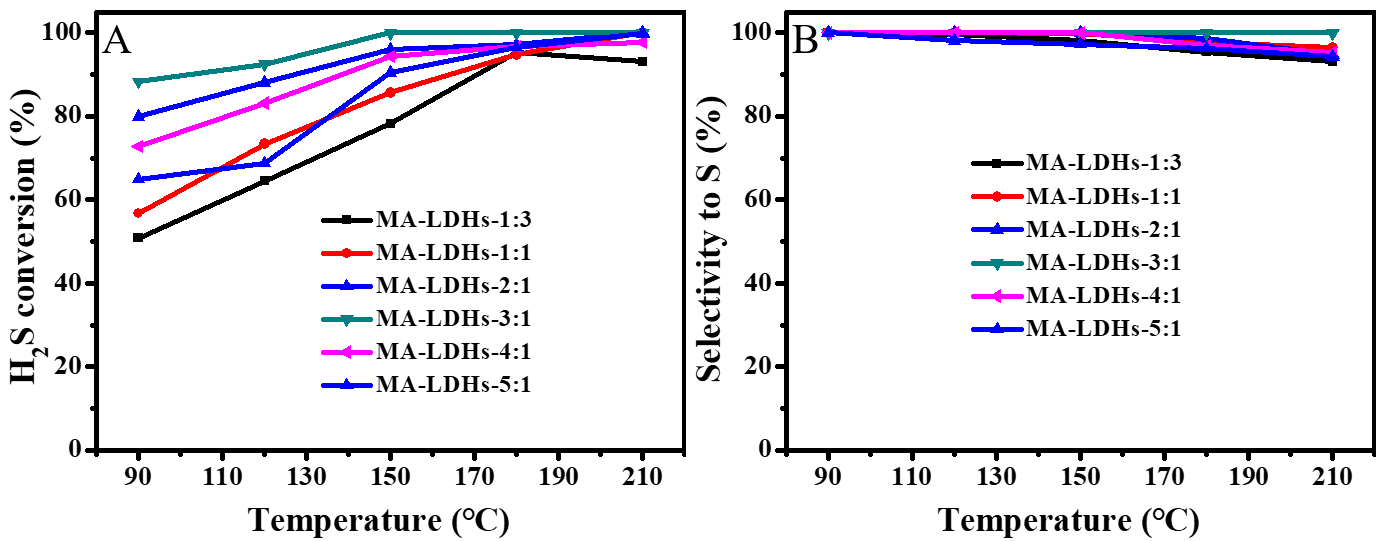


**Figure S7** Effect of reaction temperature on (A) H2S conversion and (B) H2S selectivity of MA-LDHs-x samples in H2S selective oxidation. Reaction condition: catalyst (100 mg), H2S/O2/N2=0.5/0.25/99.25 (wt%), WHSV (12 000 mL g-1·h-1).

**Supporting References**

1. G. Lei, W. Zhao, L. Shen, S. Liang, C. Au and L. Jiang, *Appl. Catal., B,* 2020, **267**,118663.

2. E. G., S. Junior, V. H. Perez, Inés Reyero, *Fuel*, 2019, **241**, 311-318.

3. X. Zheng, Y. Li, L. Zhang, L. Shen, Y. Xiao, Y. Zhang, C. Au and L. Jiang, *Appl. Catal., B,* 2019, **252**, 98-110.

4. Y. Lu, X. Chen, X. B. Xing, Z. Sun and D. Sun, *Environ. Sci.*, 2012, **33**, 2868-2874.

5. F. Zhang, X. Zhang, Z. Hao, G. Jiang, H. Yang and S. Qu, *J. Hazard. Mater.*, 2018, **342**, 749-757.

6. X. Zhang, Z. Wang, Y. Tang, N. Qiao, Y. Li, S. Qu and Z. Hao, *Catal. Sci. Technol.*, 2015, **5**, 4991-4999.

7. X. Zhang, Z. Wang, N. Qiao, S. Qu and Z. Hao, *ACS Catal.*, 2014, **4**, 1500-1510.

8. V. Palma and D. Barba, *Fuel*, 2014, **135**, 99-104.

9. D.H. Kang, M.I. Kim, D.W. Park, and J. Korean, *Chem. Eng.*, 2016, **33**, 838-843.

10. X. X. Zheng, L. J. Shen, X. P. Chen, X. H. Zheng, C. T. Au and L. L. Jiang, *Inorg. Chem.*, 2018, **57**, 10081-10089.

11. P. Nguyen, D. Edouard, J. M. Nhut, M. J. Ledoux, C. Pham and C. Pham-Huu, *Appl. Catal., B*, 2007, **76**, 300-310.

12. L. Shen, X. Zheng, G. Lei, X. Li, Y. Cao and L. Jiang, *Chem. Eng. J.*, 2018, **346**, 238-248.

13. P. Mikenin, S. Zazhigalov, A. Elyshev, S. Lopatin, T. Larina, S. Cherepanova, D. Pisarev, D. Baranov and A. Zagoruiko, *Catal. Commun.*, 2016, **87**, 36-40.

14. V. V. Shinkarev, A. M. Glushenkov, D. G. Kuvshinov and G. G. Kuvshinov, *Appl. Catal., B*, 2009, **85**, 180-191.

15. S. Zhao, D. Kang, Y. Liu, Y. Wen, X. Xie, H. Yi and X. Tang, *ACS Catal.* 2020, **10**, 11739-11750.

16. L. Shen, G. Wang, X. Zheng, Y. Cao, Y. Guo, K. Lin and L. Jiang, *Chinese J. Catal.,* 2017, **38**, 1373-1381

17. S. Liang, J. Mi, F. Liu, Y. Zheng, Y. Xiao, Y. Cao and L. Jiang, *Chem. Eng. Sci.*, 2020, **221**.

18. S. Zhao, H. Yi, X. Tang and C. Song, *Chem. Eng. J.*, 2013, **226**, 161-165.

19. X. Song, K. Li, C. Wang, X. Sun, P. Ning and L. Tang, *Chem. Eng. J.*, 2017, **330**, 727-735.
